# Supplementary material for: Microwave Synthesis of Au Nanoparticles in the Presence of Tetrahydrothiophenocucurbituril
Source: MDPI journal article supplement (doi:10.3390/molecules29010168), 2023-12-27
Supplement: s1 [file s1]

## Supporting Information

### Microwave Synthesis of Au Nanoparticles in the Presence of Tetrahydrothiophenocucurbituril

Asma S. Atthar , Shreya Saha, Ahmed Abdulrahman and Anthony I. Day \*

Chemistry, School of Science, University of New South Wales Canberra, Australian Defence Force Academy, Canberra, ACT 2600, Australia;  
asmasamaunnisa@gmail.com (A.S.A.); shreya.saha@adfa.edu.au (S.S.);  
a.abdulrahman@adfa.edu.au (A.A.)

\* Correspondence: a.day@adfa.edu.au.com

#### Table of Contents:

|                                                                                                                                                                                                                                        | Page |
|----------------------------------------------------------------------------------------------------------------------------------------------------------------------------------------------------------------------------------------|------|
| Figure S1 and S2. The $^1\text{H}$ NMR spectrum of $\text{ama@THT}_1\text{Q}[7]\text{Cl}$ in $\text{D}_2\text{O}$ and The $^1\text{H}$ NMR spectrum of $\text{ama@O-THT}_1\text{Q}[7]\text{Cl}$ in $\text{D}_2\text{O}$ , respectively | S2   |
| Figure S3. a) The $^1\text{H}$ NMR spectrum of the reaction mixture from the MW reaction of $\text{ama@THT}_1\text{Q}[7]$ with $\text{HAuCl}_4$ in water. b) A zoomed in section of the same sample.                                   | S3   |
| Figure S4. $^1\text{H}$ NMR spectrum of the reaction mixture from the MW reaction of $\text{ama@THT}_1\text{Q}[7]\text{PF}_6$ with $\text{HAuCl}_4$ after 15 min                                                                       | S4   |
| Figure S5. Visible spectra of AuNP-THTglycoluril prepared in a mixture of DMSO/water (2:1) in the MW reactor over 10 min at 70 °C.                                                                                                     | S5   |
| Figure S6. Visible spectra of AuNP- $\text{ama@THT}_1\text{Q}[7]$ prepared in water 1:1 mole ratio of Au(III) to $\text{THT}_1\text{Q}[7]$ , then addition of $\text{NaBH}_4$ solution.                                                | S6   |
| Figure S7. Visible spectra of AuNP- $\text{ama@THT}_1\text{Q}[7]$ prepared in pure water in 1:2 mole ratio of Au(III) to $\text{THT}_1\text{Q}[7]$ , then addition of $\text{NaBH}_4$ solution.                                        |      |
| Figure S8. Purified $\text{ama@THT}_1\text{Q}[7]$ TEM                                                                                                                                                                                  | S7   |
| Figure S9. Visible spectrum of AuNP-THT <sub>6</sub> Q[6] prepared in an aqueous solution of 50 mM $\text{Ca}(\text{OAc})_2$ , mole ratio of Au(III) to $\text{THT}_6\text{Q}[6]$ was 1:1.                                             | S8   |
| Figure S10. Photographs of AuNP-THT <sub>m</sub> Q[n] conjugates                                                                                                                                                                       |      |

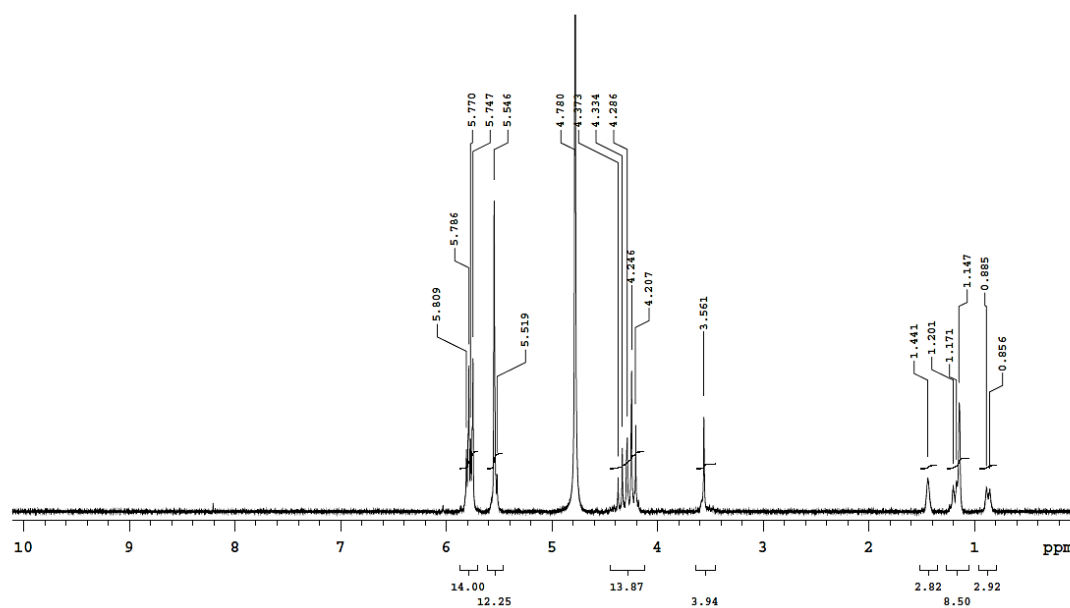

**Figure S1.** The  $^1\text{H}$  NMR spectrum of ama@THT<sub>1</sub>Q[7]Cl in D<sub>2</sub>O

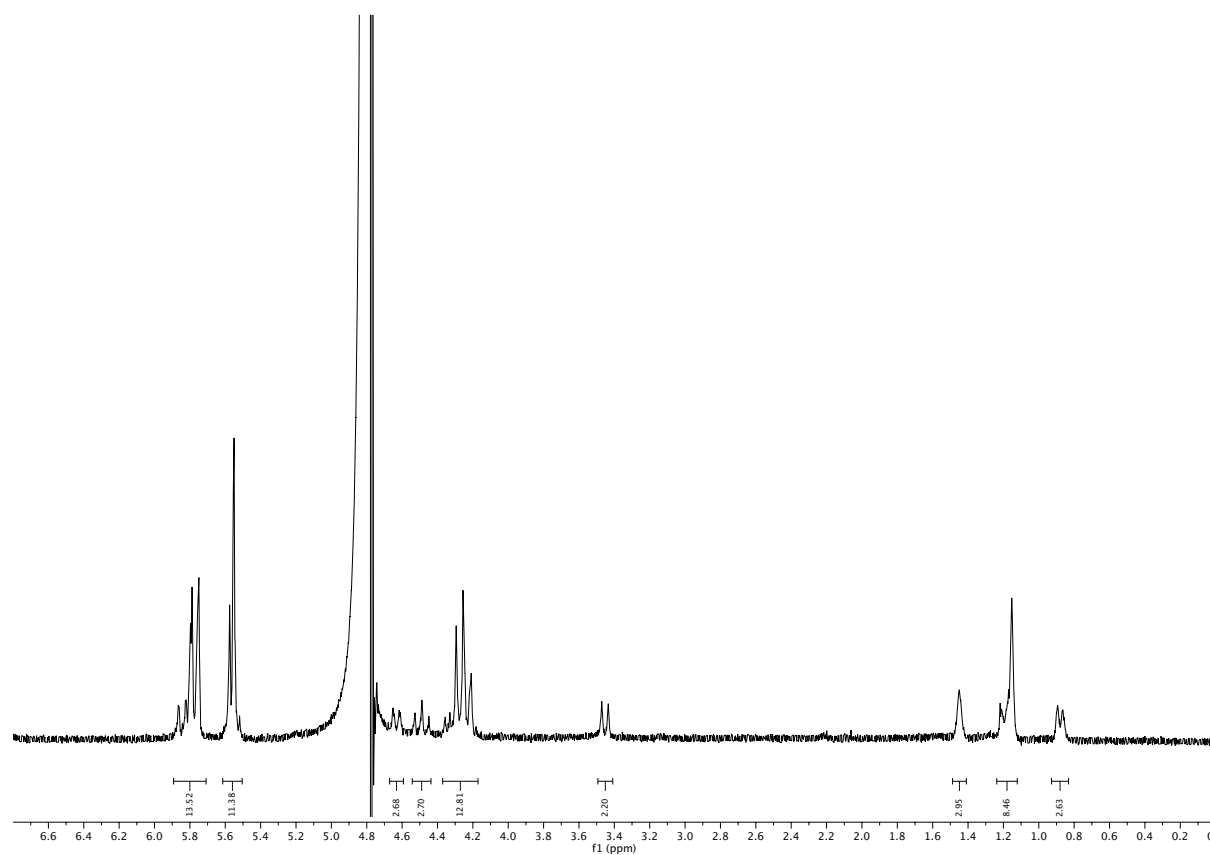

**Figure S2.** The  $^1\text{H}$  NMR spectrum of ama@O-THT<sub>1</sub>Q[7]Cl in D<sub>2</sub>O.

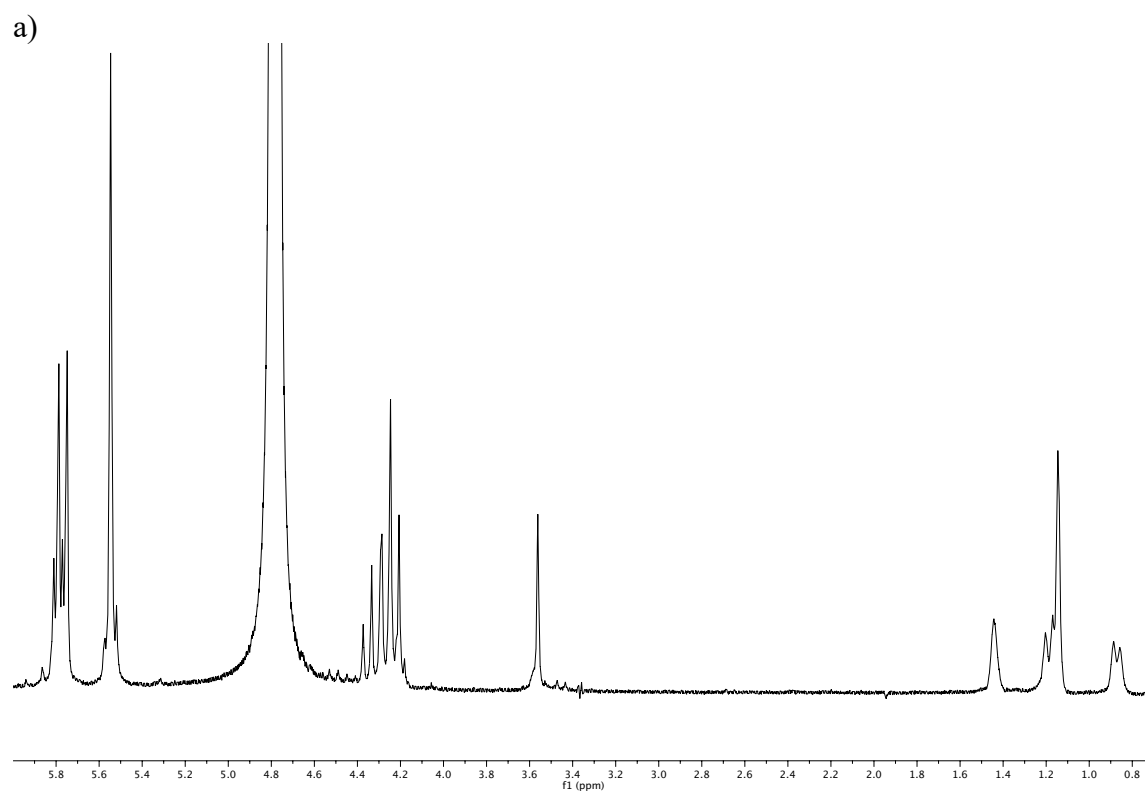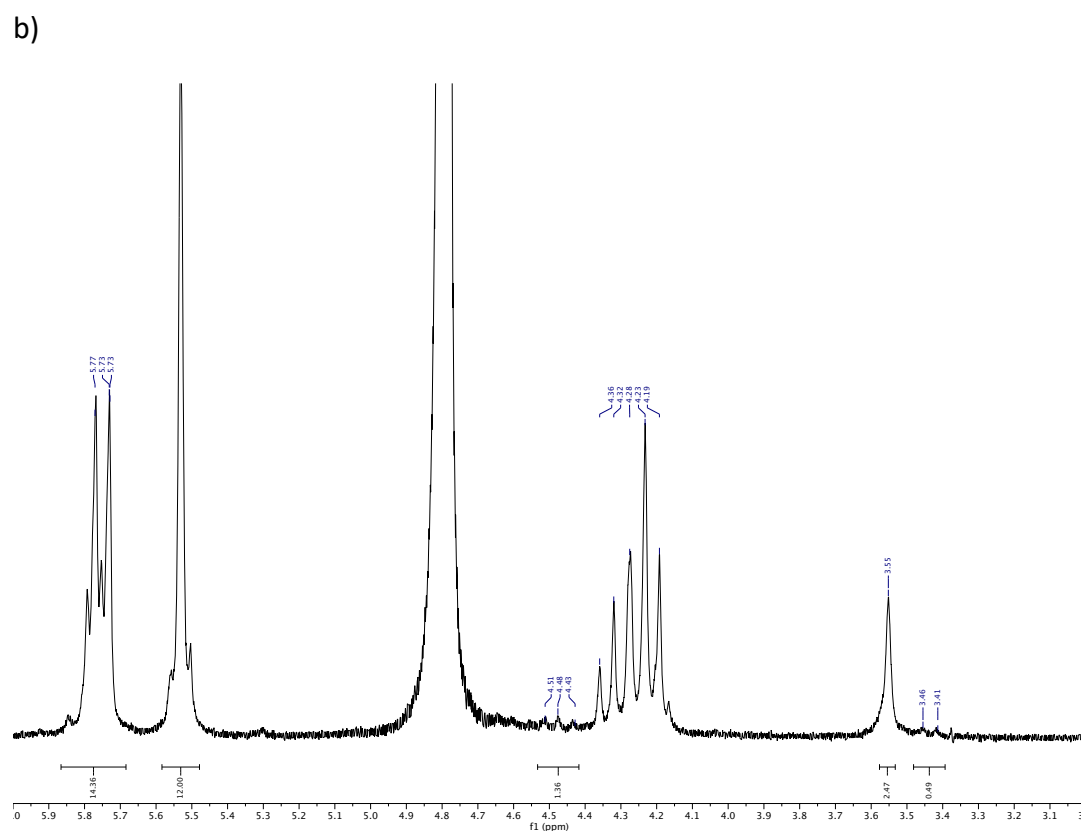

**Figure S3.** a) The  $^1\text{H}$  NMR spectrum of the reaction mixture from the MW reaction of ama@THT<sub>1</sub>Q[7] with  $\text{HAuCl}_4$  in water heated to 70 °C for 5 min. A freeze-dried sample dissolved in  $\text{D}_2\text{O}$ . b) A zoomed in section of the same sample.

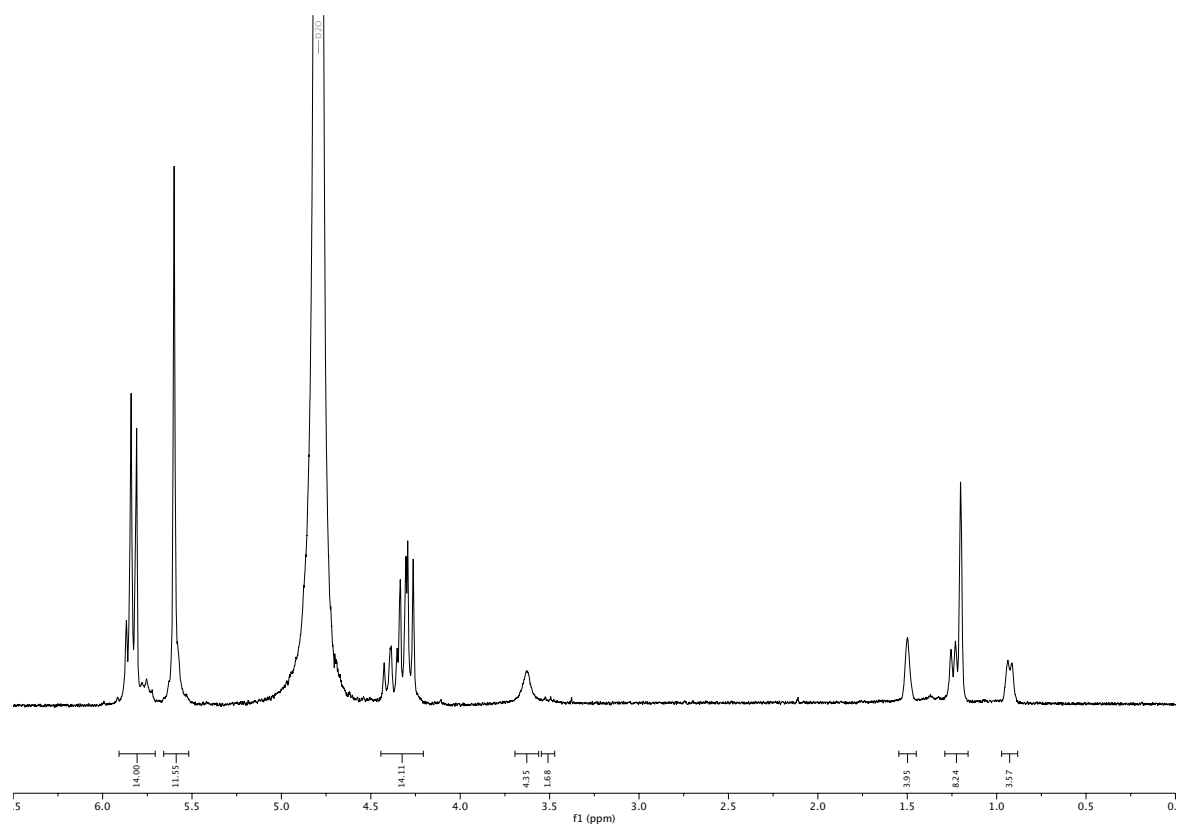

**Figure S4.** The  $^1\text{H}$  NMR spectrum (500 MHz) of the reaction mixture from the MW reaction of ama@THT<sub>1</sub>Q[7]PF<sub>6</sub> with H[AuCl<sub>4</sub>] in water heated to 70 °C for 15 min. At this point the solution is colorless and clear.

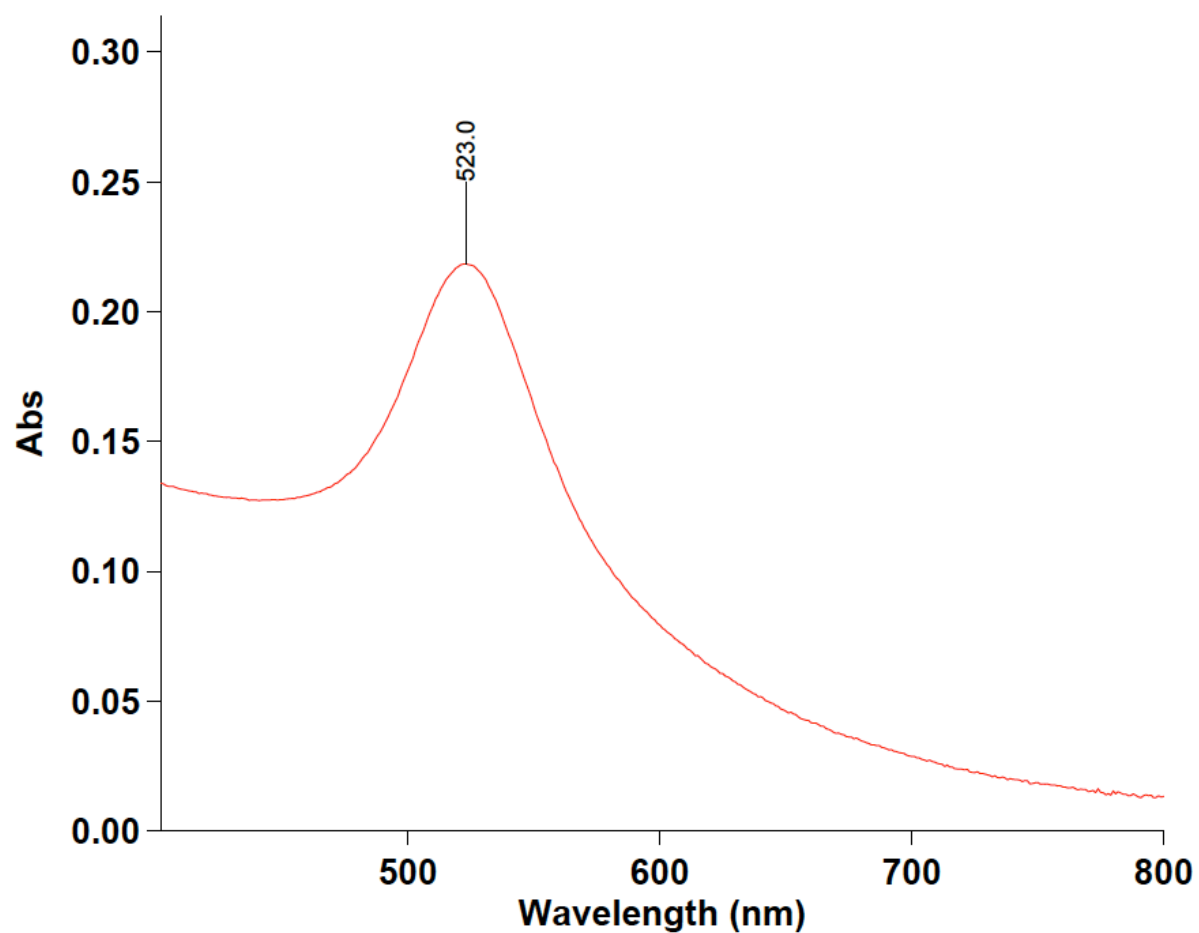

**Figure S5.** Visible spectra of AuNP-THTglycoluril prepared in a mixture of DMSO/water (2:1) in the MW reactor over 10 min at 70 °C.

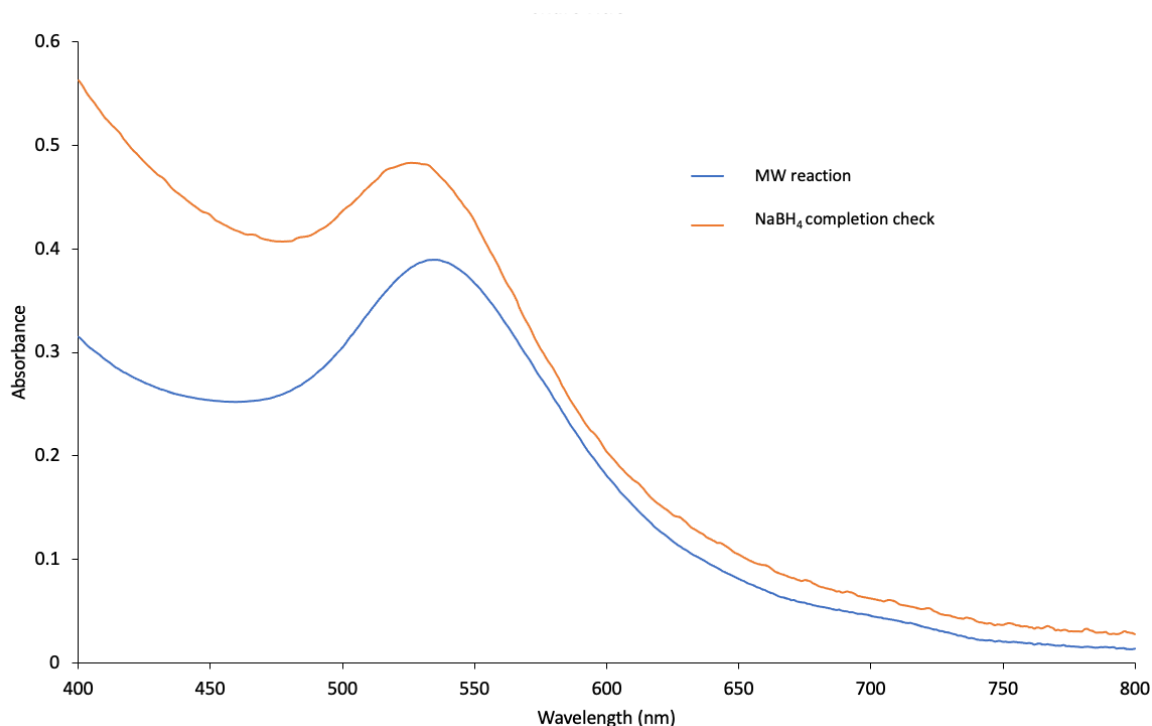

**Figure S6.** Visible spectra of AuNP-ama@THT<sub>1</sub>Q[7] prepared in pure water in the MW reactor over 10 min at 70 °C, with a 1:1 mole ratio of Au(III) to THT<sub>1</sub>Q[7]. After the reaction period was complete, a NaBH<sub>4</sub> solution was added revealing the proportion of unreacted Au salts.

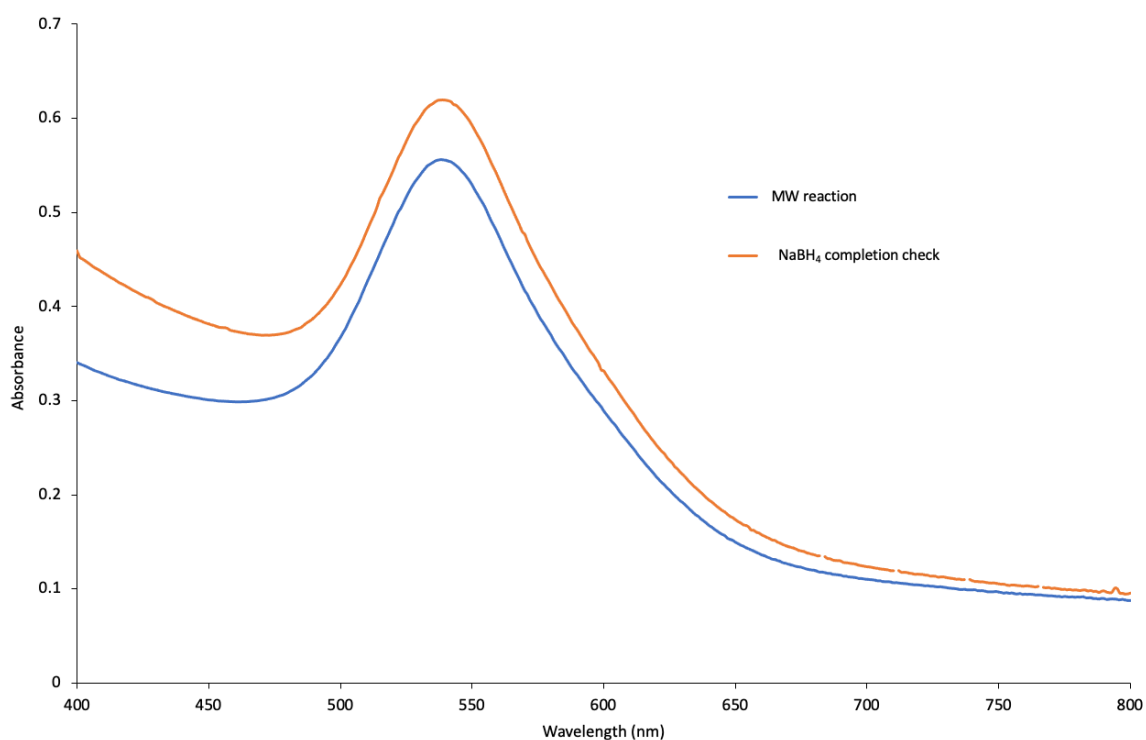

**Figure S7.** Visible spectra of AuNP-ama@THT<sub>1</sub>Q[7] prepared in pure water in the MW reactor over 15 min at 70 °C, with a 1:2 mole ratio of Au(III) to THT<sub>1</sub>Q[7]. After the reaction period was complete, a NaBH<sub>4</sub> solution was added revealing the proportion of unreacted Au salts.

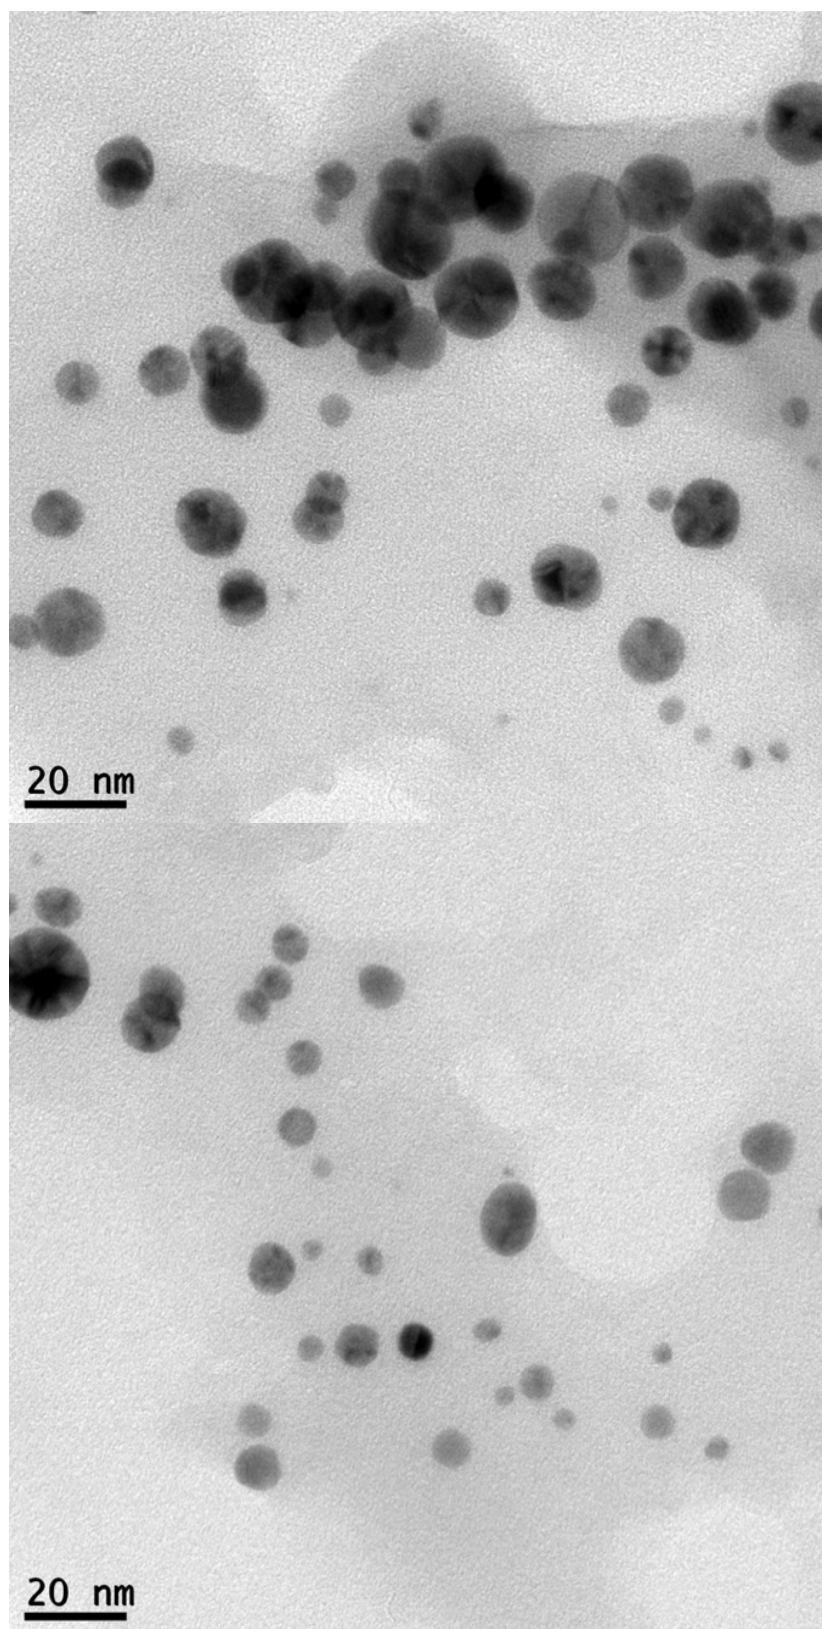

**Figure S8.** Purified ama@THT<sub>1</sub>Q[7] TEM micrographs

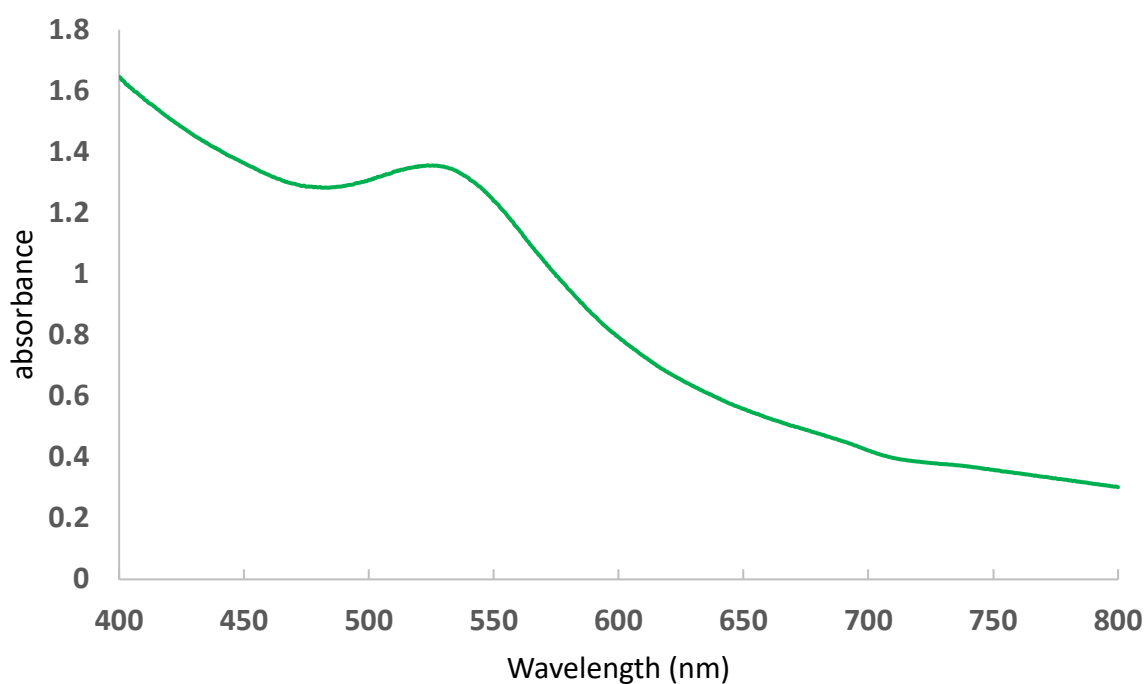

**Figure S9.** Visible spectrum of AuNP-THT<sub>6</sub>Q[6] prepared in an aqueous solution of 50 mM Ca(OAc)<sub>2</sub> in the MW reactor over 15 min at 70 °C. Mole ratio of Au(III) to THT<sub>6</sub>Q[6] was 1:1.

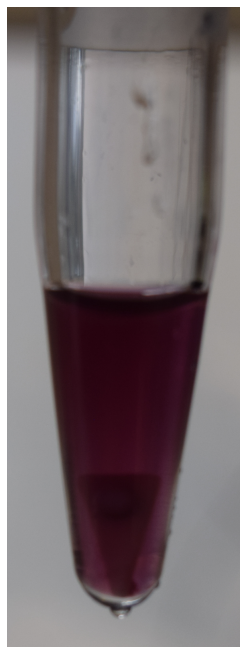

AuNP-THT<sub>6</sub>Q[6] conjugate in aqueous Ca(OAc)<sub>2</sub>.

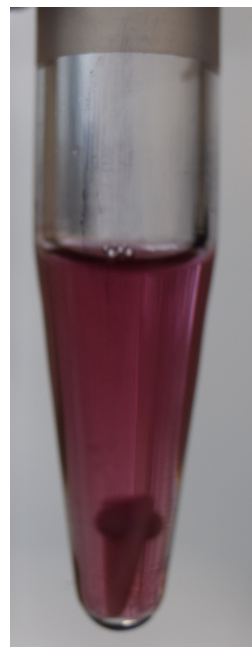

AuNP-ama@THT<sub>1</sub>Q[7] conjugate in H<sub>2</sub>O.

**Figure S10.** Photographs of AuNP-THT<sub>m</sub>Q[*n*] conjugates
